# Supplementary material
Source: HighWire-hosted journal article supplement (https://bmjopen.bmj.com/content/11/6/e044192)
Supplement: inline-supplementary-material-1 [file inline-supplementary-material-1.pdf]

**Supplementary 1: Multiple linear regression of HTN-SCP Behaviour scores and socio-demographic factors and disease characteristic in participants**

| Countries         | Malaysia                         |         |               |       |                |         | Singapore                        |         |               |       |                |         |
|-------------------|----------------------------------|---------|---------------|-------|----------------|---------|----------------------------------|---------|---------------|-------|----------------|---------|
| Variable          | Behaviour domain score Mean+/-SD | P-value | Adjusted Beta | SE    | (95% CI)       | P-value | Behaviour domain score Mean+/-SD | P-value | Adjusted Beta | SE    | (95% CI)       | P-value |
| Age, years        |                                  | 0.052   |               |       |                |         |                                  | 0.068   |               |       |                |         |
| ≥ 60              | 57.1 (9.1)                       |         | 2.047         | 0.673 | (0.728-3.365)  | 0.002*  | 59 (8.9)                         |         | 2.473         | 0.919 | (0.671-4.275)  | 0.007*  |
| Gender            |                                  | 0.288   |               |       |                |         |                                  | 0.208   |               |       |                |         |
| Women             | 56.8 (8.8)                       |         | -             | -     | -              | -       | 58.9 (9)                         |         | 1.864         | 0.883 | (0.133-3.595)  | 0.035*  |
| Ethnicity         |                                  | <0.001* |               |       |                |         |                                  | 0.001*  |               |       |                |         |
| Chinese           | 55.6 (31)                        |         | Ref           |       |                |         | 57.9 (8.7)                       |         | Ref           |       |                |         |
| Malay             | 58.3 (32)                        |         | 3.192         | 0.751 | (1.719-4.665)  | <0.001* | 55.8 (11.7)                      |         | -0.939        | 1.510 | (-3.899-2.02)  | 0.534   |
| Indian            | 59.7 (35)                        |         | 4.389         | 0.906 | (2.614-6.164)  | <0.001* | 60.7 (8.4)                       |         | 3.271         | 1.113 | (1.09-5.452)   | 0.003*  |
| Others            | 0                                |         | -             | -     | -              | -       | 68 (5.9)                         |         | 9.250         | 3.335 | (2.714-15.786) | 0.006*  |
| Education level   |                                  | <0.001* |               |       |                |         |                                  | 0.004*  |               |       |                |         |
| Primary and below | 56.8 (34)                        |         | Ref           |       |                |         | 56.5 (8.7)                       |         | Ref           |       |                |         |
| Secondary         | 57.1 (31)                        |         | 0.069         | 0.736 | (-1.373-1.512) | 0.925   | 59.5 (9.1)                       |         | 3.184         | 0.972 | (1.28-5.088)   | 0.001*  |
| Tertiary          | 62.1 (39)                        |         | 4.274         | 1.071 | (2.175-6.373)  | <0.001* | 59.5 (9.3)                       |         | 4.243         | 1.217 | (1.857-6.629)  | <0.001* |
| Marital status    |                                  | 0.802   |               |       |                |         |                                  | 0.202   |               |       |                |         |
| Married           | 56.6 (8.9)                       |         | -             | -     | -              | -       | 58.8 (8.8)                       |         | 1.275         | 0.902 | (-0.492-3.042) | 0.157   |

|                                      |            |       |        |       |                |       |             |       |   |   |   |   |
|--------------------------------------|------------|-------|--------|-------|----------------|-------|-------------|-------|---|---|---|---|
| No. of anti-hypertensive medications |            | 0.961 |        |       |                |       |             | 0.547 |   |   |   |   |
| 0                                    | 64.4 (43)  |       | -      | -     | -              | -     | 60.6 (11)   |       | - | - | - | - |
| 1                                    | 57.7 (32)  |       | -      | -     | -              | -     | 57.9 (9.4)  |       | - | - | - | - |
| 2                                    | 57.3 (31)  |       | -      | -     | -              | -     | 58.6 (9.1)  |       | - | - | - | - |
| 3                                    | 58.2 (37)  |       | -      | -     | -              | -     | 60.1 (7.9)  |       | - | - | - | - |
| > 4                                  | 59.4 (43)  |       | -      | -     | -              | -     | 57.4 (8.5)  |       | - | - | - | - |
| Blood pressure well-controlled       |            | 0.102 |        |       |                |       |             | 0.611 |   |   |   |   |
| Yes                                  | 55.7 (8.5) |       | 0.798  | 0.709 | (-0.593-2.188) | 0.261 | 58.5 (9)    |       | - | - | - | - |
| Body Mass Index (BMI) kg/m2          |            | 0.946 |        |       |                |       |             | 0.535 |   |   |   |   |
| Underweight (<18.5)                  | 62.8 (41)  |       | -      | -     | -              | -     | 61.3 (12.2) |       | - | - | - | - |
| Normal weight (18.5-22.9)            | 58.5 (34)  |       | -      | -     | -              | -     | 59.3 (8.6)  |       | - | - | - | - |
| Overweight (23-27.4)                 | 57.4 (35)  |       | -      | -     | -              | -     | 57.8 (8.7)  |       | - | - | - | - |
| Obese (>27.5)                        | 57.6 (31)  |       | -      | -     | -              | -     | 58.3 (9.4)  |       | - | - | - | - |
| Presence of diabetes mellitus        |            | 0.168 |        |       |                |       |             | 0.554 |   |   |   |   |
| Yes                                  | 56.2 (8.6) |       | -1.245 | 0.695 | (-2.608-0.118) | 0.073 | 58.1 (8.8)  |       | - | - | - | - |

## Notes:

Univariate analysis (t-test or ANOVA). \* P-value < 0.05.

Variables from univariate analysis with P-values of less than 0.250 were included in the multivariate analysis, variables which were not included were represented in dashes (-).
