# Supplementary material
Source: HighWire-hosted journal article supplement (https://bmjopen.bmj.com/content/11/6/e044192)
Supplement: inline-supplementary-material-2 [file inline-supplementary-material-2.pdf]

**Supplementary 2: Multiple linear regression of HTN-SCP Motivation domain scores and socio-demographic factors and disease characteristic in participants**

| Countries         | Malaysian                            |         |               |       |               |         | Singapore                            |         |               |       |                |         |
|-------------------|--------------------------------------|---------|---------------|-------|---------------|---------|--------------------------------------|---------|---------------|-------|----------------|---------|
| Variable          | Motivation domain score<br>Mean+/-SD | P-value | Adjusted Beta | SE    | (95% CI)      | P-value | Motivation domain score<br>Mean+/-SD | P-value | Adjusted Beta | SE    | (95% CI)       | P-value |
| Age, years        |                                      | 0.19    |               |       |               |         |                                      | 0.943   |               |       |                |         |
| ≥ 60              | 64.7 (9.1)                           |         | 1.041         | 0.683 | (-0.298-2.38) | 0.128   | 67 (10.5)                            |         | -             | -     | -              | -       |
| Gender            |                                      | 0.031*  |               |       |               |         |                                      | 0.208   |               |       |                |         |
| Women             | 65.8 (8.8)                           |         | 2.091         | 0.659 | (0.799-3.383) | 0.002*  | 67.7 (10.5)                          |         | 1.870         | 1.009 | (-0.107-3.848) | 0.064   |
| Ethnicity         |                                      | <0.001* |               |       |               |         |                                      | 0.013*  |               |       |                |         |
| Chinese           | 61.7 (9.6)                           |         | Ref           |       |               |         | 66.3 (10.2)                          |         | Ref           |       |                |         |
| Malay             | 66.9 (7.9)                           |         | 4.339         | 0.756 | (2.857-5.82)  | <0.001* | 66 (13.7)                            |         | 0.217         | 1.691 | (-3.098-3.532) | 0.898   |
| Indian            | 67.4 (8.5)                           |         | 5.099         | 0.887 | (3.359-6.838) | <0.001* | 69.8 (8.7)                           |         | 3.734         | 1.266 | (1.254-6.215)  | 0.003   |
| Others            | 0                                    |         |               |       |               |         | 74 (7.6)                             |         | 6.134         | 3.824 | (-1.362-13.63) | 0.109   |
| Education level   |                                      | <0.001* |               |       |               |         |                                      | <0.001* |               |       |                |         |
| Primary and below | 62.6 (8.9)                           |         | Ref           |       |               |         | 64 (10.4)                            |         | Ref           |       |                |         |
| Secondary         | 65.9 (8.7)                           |         | 3.125         | 0.730 | (1.693-4.557) | <0.001* | 69.1 (10.1)                          |         | 5.067         | 1.104 | (2.903-7.232)  | <0.001* |
| Tertiary          | 69.5 (8.4)                           |         | 7.136         | 1.067 | (5.045-9.227) | <0.001* | 68.6 (9.8)                           |         | 5.528         | 1.360 | (2.863-8.193)  | <0.001* |
| Marital status    |                                      | 0.525   |               |       |               |         |                                      | 0.44    |               |       |                |         |
| Married           | 65.3 (9)                             |         | -             | -     | -             | -       | 67.3 (10)                            |         | -             | -     | -              | -       |

|                                         |            |        |        |       |                |       |             |       |   |   |   |   |
|-----------------------------------------|------------|--------|--------|-------|----------------|-------|-------------|-------|---|---|---|---|
| No. of anti-hypertensive medications    |            | 0.927  |        |       |                |       |             | 0.772 |   |   |   |   |
| 0                                       | 64.6 (6.2) |        | -      | -     | -              | -     | 70.3 (9.4)  |       | - | - | - | - |
| 1                                       | 65.3 (9)   |        | -      | -     | -              | -     | 66.5 (10.3) |       | - | - | - | - |
| 2                                       | 65.3 (9.3) |        | -      | -     | -              | -     | 67.7 (10.6) |       | - | - | - | - |
| 3                                       | 64.5 (9.1) |        | -      | -     | -              | -     | 67 (11.1)   |       | - | - | - | - |
| > 4                                     | 65.5 (8.5) |        | -      | -     | -              | -     | 67.4 (7.4)  |       | - | - | - | - |
| Blood pressure well-controlled          |            | 0.074  |        |       |                |       |             | 0.827 |   |   |   |   |
| Yes                                     | 64.3 (9.1) |        | 0.329  | 0.672 | (-0.988-1.647) | 0.624 | 67.1 (10)   |       | - | - | - | - |
| Body Mass Index (BMI) kg/m <sup>2</sup> |            | 0.005* |        |       |                |       |             | 0.608 |   |   |   |   |
| Underweight (<18.5)                     | 65 (3.2)   |        | -0.073 | 3.002 | (-5.956-5.81)  | 0.981 | 69.4 (8.6)  |       | - | - | - | - |
| Normal weight (18.5-22.9)               | 63.7 (9)   |        | -1.831 | 0.951 | (-3.695-0.032) | 0.054 | 66.6 (9.9)  |       | - | - | - | - |
| Overweight (23-27.4)                    | 64.1 (9.3) |        | -1.392 | 0.733 | (-2.828-0.044) | 0.057 | 66.4 (10)   |       | - | - | - | - |
| Obese (>27.5)                           | 66.5 (8.9) |        | Ref    |       |                |       | 67.8 (10.8) |       | - | - | - | - |
| Presence of diabetes mellitus           |            | 0.338  |        |       |                |       |             | 0.775 |   |   |   |   |
| Yes                                     | 64.9 (9)   |        | -      | -     | -              | -     | 67.2 (10.6) |       | - | - | - | - |

## Notes:

Univariate analysis (t-test or ANOVA). \* P-value < 0.05.

Variables from univariate analysis with P-values of less than 0.250 were included in the multivariate analysis, variables which were not included were represented in dashes (-).
